# Supplementary material for: The Impact of Platelet-Rich Plasma Application during Cesarean Section on Wound Healing and Postoperative Pain: A Single-Blind Placebo-Controlled Intervention Study
Source: MDPI journal article supplement (doi:10.3390/medicina60040628), 2024-04-13
Supplement: s1 [file s1]

## Skala oceny bólu pooperacyjnego VAS- Visual Analog Scale

Szanowna Pani,

W związku z udziałem w badaniu naukowym prosimy o odpowiedź na następujące pytania.

1. Jak by Pani oceniła natężenie bólu tuż po zabiegu za pomocą poniższej skali?

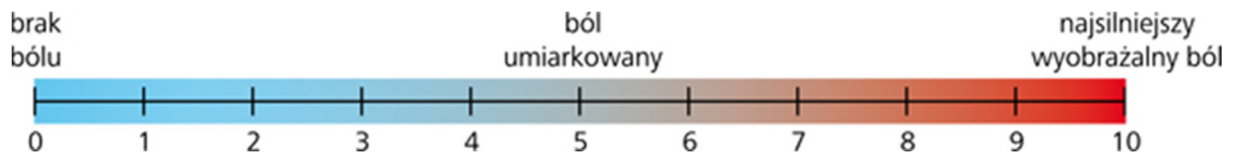

2. Jak by Pani oceniła natężenie bólu 6 godzin po zabiegu za pomocą poniższej skali?

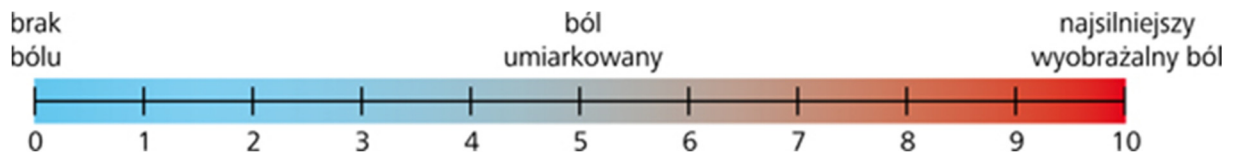

3. Jak by Pani oceniła natężenie bólu 12 godzin po zabiegu za pomocą poniższej skali?

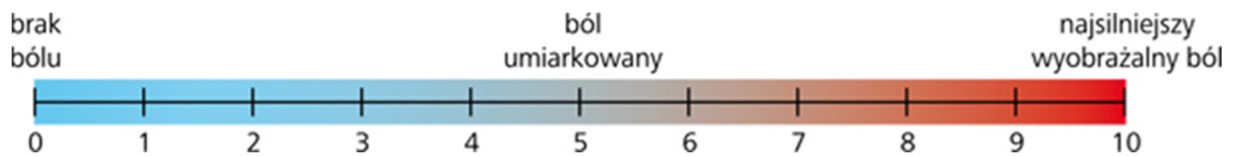

## Skala obserwacyjna wyglądu blizn - POSAS The Patient and Observer Scar Assessment Scale

## DATA

MIEJSCE

DANE OSOBY OCENIAJĄCEJ

IMIE, NAZWISKO PACJENTA

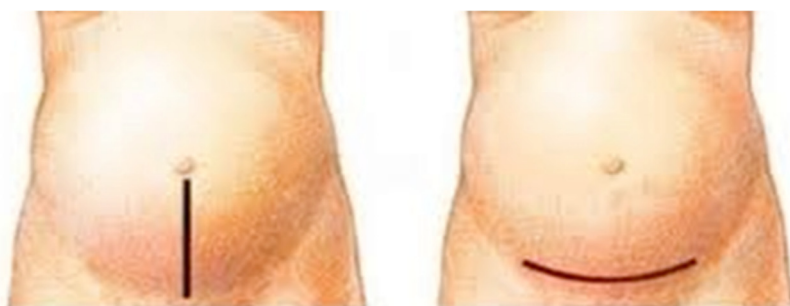

**1 = prawidłowy wygląd blizny**

**10 = najgorzej wyglądająca blizna**

[illegible]

### WYJAŚNIENIE:

- Skala obserwacyjna POSAS składa się z sześciu elementów: unaczynienia, pigmentacji, grubości, wypukłość, giętkości oraz oceny ogólnej powierzchni.
- Wszystkie elementy są punktowane w skali w zakresie od 1 (jak skóry normalnej ) do 10 (najgorszej blizny jaką można sobie wyobrazić).
- Suma sześciu elementów prowadzi do całkowitej punktacji w skali POSAS.
- Kategorie pola są dodawane do każdego elementu.
- Wszystkie parametry powinny być oceniane wyżej niż 1 w stosunku do normalnej skóry na porównywalnej lokalizacji anatomicznej.
- **Obecność ukrwienie naczyń** w tkance blizny ocenianych przez ilość zaczerwienienia badanego przez ilość krwi po powrocie przy ucisku.
- **Pigmentacja**- zabarwienie blizny od pigmentu (melaniny); zastosowania ucisku na skórę z umiarkowanym ciśnieniem, aby wyeliminować wpływ ukrwienia na kolor blizny.
- **Grubość blizny** - średnia odległość między granicą podskórnej i powierzchnią naskórka blizny w wymiarze poprzecznym, czyli w szerokości.
- **Wypukłość** – wybrzuszenie blizny w stosunku do otaczającej prawidłowej skóry - wysokość.
- **Giętkość** -jędrność badanej skóry marszcząc bliznę między kciukiem i palcem wskazującym.
- **Powierzchnia blizny** w stosunku do pierwotnego obszaru rany.
